# Supplementary material for: A Zn-doped Fe3O4 nanoparticle@N, S and P doped Elaeagnus angustifolia gum derived carbon hybrid electrocatalyst: synthesis, characterization and electrochemical sensing of acetaminophen
Source: Royal Society of Chemistry journal article supplement (doi:10.1039/d3ma00480e), 2023-01-01

Supplementary information

## Zn-Doped Fe<sub>3</sub>O<sub>4</sub> Nanoparticle @ N, S and P Doped Elaeagnus Angustifolia Gum Derived Carbon Hybrid Electrocatalyst: Synthesis, Characterization and Electrochemical Sensing of Acetaminophen

Xamxikamar Mamat,<sup>a</sup> Zehong Gao<sup>a</sup> and Longyi Chen<sup>\*a</sup>

Key Laboratory of Chemistry of Plant Resources in Arid Regions, State Key Laboratory Basis of Xinjiang Indigenous Medicinal Plants Resource Utilization, Xinjiang Technical Institute of Physics and Chemistry, Chinese Academy of Sciences, Urumqi, 830011 China;

Figure S1 (A) EDX spectrum of NSP-BC, electrocatalyst S1 and electrocatalyst S4, (B) particle diameter measurement of the nanoparticles in electrocatalyst S1 and electrocatalyst S4.

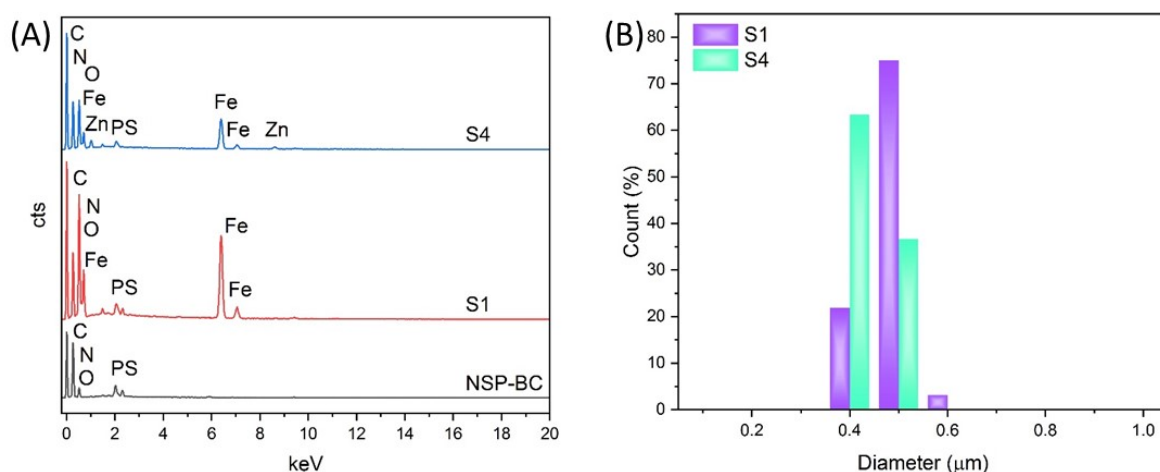

Supplement: d3ma00480e1.pdf [file d3ma00480e1.pdf]
